# Supplementary material for: Low-Dose BPA Exposure Alters the Mesenchymal and Epithelial Transcriptomes of the Mouse Fetal Mammary Gland
Source: PLoS One. 2013 May 21;8(5):e63902. doi: 10.1371/journal.pone.0063902 (PMC3660582; doi:10.1371/journal.pone.0063902)
Supplement: Table S1 — Morphometric properties of CD1 and C57BL/6 fetal mammary glands. (DOC) [file pone.0063902.s004.doc]

**Table S1: Morphometric properties of CD1 and C57BL/6 fetal mammary glands**

|  | **E18 CD1** | **E18 BL/6** | **E19 CD1** | **E19 BL/6** |
| --- | --- | --- | --- | --- |
| **Area subtended by ducts (µm2)** | 13964.78+5455.33 a | 7553.74+3489.25 b | 34768.22+12106.13 c | 14444.69+3831.25 a |
| **Ductal area (µm2)** | 7351.67+2187.18 a | 4576.18+1668.31 b | 13689.25+3348.63 c | 7273.05+1787.89 a |
| **Ductal length (µm)** | 183.21+43.18 a | 144.67+47.70 b | 260.51+59.04 c | 158.07+65.71 a b |
| **# branching points** | 3.40+1.47 a | 2.29+1.38 a | 7.45+2.77 b | 3.33+1.05 a |
| **# terminal ends** | 4.44+1.56 a | 3.29+1.38 a | 8.91+2.98 b | 4.47+0.99 a |

A comparison of the morphometric properties of ductal structures in the mammary glands of CD1 and C57BL/6 mice at E16, E18 and E19. (Differing alphabets indicate significant differences analyzed by the t-test, p<0.05)
